# Supplementary material for: Prevalence of Dementia in Korea Based on Hospital Utilization Data from 2008 to 2016
Source: PubMed Central journal article supplement — Yonsei Med J. 2021 Sep 10;62(10):948–53. doi: 10.3349/ymj.2021.62.10.948 (PMC8470559; doi:10.3349/ymj.2021.62.10.948), 2021-09-10
Supplement: ymj-62-948-s001.pdf [file ymj-62-948-s001.pdf]

**Supplementary Table 1.** Age-Standardized Prevalence of Dementia per 1000 Population from 2008 to 2016 Analyzed according to Sex among Patients <65 Years of Age

| Year | Male             |                  |                               | Female           |                  |                               | Female-to-male prevalence ratio <sup>†</sup> |
|------|------------------|------------------|-------------------------------|------------------|------------------|-------------------------------|----------------------------------------------|
|      | Crude            | Standardized*    | Prevalence ratio <sup>†</sup> | Crude            | Standardized*    | Prevalence ratio <sup>†</sup> |                                              |
| 2008 | 0.39 (0.38–0.40) | 0.39 (0.38–0.40) | Reference                     | 0.40 (0.39–0.41) | 0.40 (0.39–0.41) | Reference                     | 0.98 (0.94–1.02)                             |
| 2009 | 0.44 (0.43–0.45) | 0.43 (0.42–0.44) | 1.13 (1.10–1.15)              | 0.46 (0.46–0.47) | 0.46 (0.45–0.47) | 1.14 (1.11–1.18)              | 1.01 (0.98–1.05)                             |
| 2010 | 0.50 (0.49–0.51) | 0.48 (0.47–0.49) | 1.26 (1.23–1.28)              | 0.53 (0.52–0.54) | 0.51 (0.50–0.52) | 1.28 (1.25–1.32)              | 1.02 (0.99–1.05)                             |
| 2011 | 0.53 (0.52–0.54) | 0.50 (0.49–0.51) | 1.34 (1.32–1.37)              | 0.58 (0.57–0.59) | 0.55 (0.54–0.56) | 1.39 (1.35–1.43)              | 1.05 (1.02–1.08)                             |
| 2012 | 0.53 (0.52–0.54) | 0.49 (0.48–0.50) | 1.36 (1.33–1.38)              | 0.62 (0.61–0.63) | 0.57 (0.56–0.58) | 1.44 (1.40–1.48)              | 1.11 (1.08–1.15)                             |
| 2013 | 0.55 (0.54–0.56) | 0.50 (0.49–0.51) | 1.37 (1.34–1.40)              | 0.63 (0.62–0.64) | 0.58 (0.57–0.59) | 1.45 (1.41–1.49)              | 1.10 (1.07–1.14)                             |
| 2014 | 0.56 (0.55–0.57) | 0.50 (0.50–0.51) | 1.35 (1.32–1.37)              | 0.62 (0.61–0.63) | 0.56 (0.55–0.57) | 1.40 (1.36–1.44)              | 1.07 (1.04–1.10)                             |
| 2015 | 0.57 (0.56–0.58) | 0.50 (0.49–0.51) | 1.32 (1.30–1.35)              | 0.65 (0.64–0.66) | 0.56 (0.55–0.57) | 1.38 (1.35–1.42)              | 1.08 (1.05–1.12)                             |
| 2016 | 0.62 (0.61–0.63) | 0.52 (0.51–0.53) | 1.34 (1.32–1.37)              | 0.67 (0.66–0.69) | 0.56 (0.55–0.57) | 1.37 (1.33–1.41)              | 1.04 (1.01–1.07)                             |

The values in parentheses are the 95% confidence intervals.

\*For the estimation of age-standardized prevalence, the mid-year population of 2008 was used, <sup>†</sup>Age-adjusted prevalence ratio.
