# Supplementary material for: Prevalence of Dementia in Korea Based on Hospital Utilization Data from 2008 to 2016
Source: PubMed Central journal article supplement — Yonsei Med J. 2021 Sep 10;62(10):948–53. doi: 10.3349/ymj.2021.62.10.948 (PMC8470559; doi:10.3349/ymj.2021.62.10.948), 2021-09-10
Supplement: ymj-62-948-s002.pdf [file ymj-62-948-s002.pdf]

**Supplementary Table 2.** Prevalence of Dementia per 1000 Population from 2008 to 2016 according to Age and Sex

| Age         | 2008               |                       |                                 | 2016                  |                       |                                 | Adjusted prevalence ratio* |
|-------------|--------------------|-----------------------|---------------------------------|-----------------------|-----------------------|---------------------------------|----------------------------|
|             | Male               | Female                | Female-to-male prevalence ratio | Male                  | Female                | Female-to-male prevalence ratio |                            |
| <60 years   | 0.2 (0.22–0.23)    | 0.2 (0.20–0.21)       | 0.92 (0.89–0.96)                | 0.3 (0.33–0.34)       | 0.3 (0.32–0.33)       | 0.98 (0.95–1.01)*               | 1.53 (1.48–1.58)           |
| 60–64 years | 4.0 (3.89–4.14)    | 4.2 (4.06–4.30)       | 1.04 (1.00–1.09)                | 4.6 (4.53–4.74)       | 5.1 (5.00–5.21)       | 1.10 (1.07–1.13)                | 1.19 (1.15–1.23)           |
| 65–69 years | 8.6 (8.40–8.78)    | 11.4 (11.22–11.63)    | 1.33 (1.29–1.37)                | 12.8 (12.58–13.01)    | 15.3 (15.10–15.55)    | 1.20 (1.17–1.23)                | 1.40 (1.37–1.43)           |
| 70–74 years | 17.8 (17.50–18.17) | 25.1 (24.80–25.48)    | 1.41 (1.38–1.44)                | 30.3 (29.88–30.64)    | 44.0 (43.53–44.37)    | 1.45 (1.43–1.48)                | 1.73 (1.70–1.76)           |
| 75–79 years | 35.4 (34.76–36.02) | 49.5 (48.92–50.07)    | 1.40 (1.37–1.43)                | 60.5 (59.89–61.14)    | 95.1 (94.49–95.79)    | 1.57 (1.55–1.59)                | 1.86 (1.83–1.89)           |
| 80–84 years | 58.0 (56.83–59.25) | 78.5 (77.59–79.48)    | 1.35 (1.32–1.39)                | 109.8 (108.63–110.95) | 173.4 (172.31–174.44) | 1.58 (1.56–1.6)                 | 2.13 (2.10–2.16)           |
| ≥85 years   | 81.4 (79.45–83.32) | 106.6 (105.32–107.92) | 1.31 (1.28–1.35)                | 188.5 (186.25–190.69) | 280.4 (278.86–282.02) | 1.49 (1.47–1.51)                | 2.57 (2.53–2.61)           |

The values in parentheses are the 95% confidence intervals.

\*Sex-adjusted prevalence ratio using log binomial generalized linear mixed model (2008 vs. 2016).
